# Supplementary material for: Oral Zinc-Rich Oyster Supplementation Corrects Anemia in Rats
Source: MDPI journal article supplement (doi:10.3390/nu15214675), 2023-11-04
Supplement: s1 [file s1]

Table S1. Hematology of the normal rats, phenylhydrazine (PHZ)-induced rats and anemic rats with different zinc supplementation

| Rat group                                         | RBC<br>(10 <sup>6</sup> /mm <sup>3</sup> ) | HCT<br>(%)                | Hb<br>(g/dl)              | MCV<br>(μm <sup>3</sup> ) | MCH<br>(pg/cell)     | MCHC<br>(g/dl) |
|---------------------------------------------------|--------------------------------------------|---------------------------|---------------------------|---------------------------|----------------------|----------------|
| 1. d0                                             |                                            |                           |                           |                           |                      |                |
| Normal rats                                       |                                            |                           |                           |                           |                      |                |
| (n=6)                                             | 7.00 ± 0.18                                | 46.6 ± 1.1                | 15.2 ± 0.5                | 67 ± 2                    | 22 ± 1               | 33 ± 1         |
| 2. d2                                             |                                            |                           |                           |                           |                      |                |
| Saline injected rats                              |                                            |                           |                           |                           |                      |                |
| (n=6)                                             | 6.99 ± 0.27                                | 40.5 ± 1.7                | 14.0 ± 0.5                | 58 ± 2                    | 20 ± 1               | 35 ± 1         |
| PHZ-induced anemic rats                           |                                            |                           |                           |                           |                      |                |
| (n=24)                                            | 5.01 ± 0.79                                | 37.2 ± 4.4                | 14.9 ± 2.2                | 75 ± 11                   | 30 ± 6               | 40 ± 4         |
| 3. d6                                             |                                            |                           |                           |                           |                      |                |
| 4 days after zinc supplementation                 |                                            |                           |                           |                           |                      |                |
| (a) Saline-injected                               |                                            |                           |                           |                           |                      |                |
| (n=6)                                             | 4.46 ± 0.30                                | 33.3 ± 1.4                | 11.9 ± 0.7                | 75 ± 4                    | 27 ± 1               | 36 ± 1         |
| (b) ZnSO <sub>4</sub> -injected                   |                                            |                           |                           |                           |                      |                |
| (n=6)                                             | 5.65 ± 0.56 <sup>**</sup>                  | 37.8 ± 0.6 <sup>***</sup> | 13.2 ± 0.1 <sup>**</sup>  | 68 ± 6 <sup>*</sup>       | 24 ± 2 <sup>*</sup>  | 35 ± 4         |
| (c) Fed with ZnSO <sub>4</sub> ·7H <sub>2</sub> O |                                            |                           |                           |                           |                      |                |
| (n=6)                                             | 4.51 ± 0.42                                | 34.0 ± 1.9                | 11.9 ± 0.7                | 76 ± 8                    | 26 ± 3               | 35 ± 1         |
| (d) Fed with oyster                               |                                            |                           |                           |                           |                      |                |
| (n=6)                                             | 5.81 ± 0.55 <sup>***</sup>                 | 38.9 ± 1.4 <sup>***</sup> | 13.9 ± 0.6 <sup>***</sup> | 67 ± 6 <sup>*</sup>       | 24 ± 2 <sup>**</sup> | 36 ± 1         |

RBC total red blood cell count, HCT hematocrit, Hb hemoglobin, MCV mean corpuscular volume concentration (HCT/RBC × 10), MCH mean corpuscular hemoglobin (Hb/RBC × 100), MCHC mean corpuscular hemoglobin concentration (Hb/HCT × 100)

The data are expressed as the mean ± SD

(\*  $p < 0.05$ , \*\*  $p < 0.01$ , \*\*\*  $p < 0.001$  Compared with the saline-injected group)
