# Supplementary material for: Oral Zinc-Rich Oyster Supplementation Corrects Anemia in Rats
Source: MDPI journal article supplement (doi:10.3390/nu15214675), 2023-11-04
Supplement: s1 [file s1]

Table S3. Plasma zinc level in blood of the oral ZnSO<sub>4</sub>·7H<sub>2</sub>O, and oyster-supplemented 5/6 nephrectomized anemic rats

| Rat group                                                                                                     | Plasma Zn level in blood |          |
|---------------------------------------------------------------------------------------------------------------|--------------------------|----------|
|                                                                                                               | (µg/mL plasma)           | <i>p</i> |
| 1. A group                                                                                                    |                          |          |
| Normal rats (+0 mg Zn supplementation)                                                                        |                          |          |
| 0 weeks (n=6)                                                                                                 | 1.70 ± 0.17              |          |
| 2 " (n=6)                                                                                                     | 1.59 ± 0.10              | 0.1680   |
| 4 " (n=6)                                                                                                     | 1.88 ± 0.16              | 0.0522   |
| 6 " (n=6)                                                                                                     | 1.93 ± 0.14              | 0.0464*  |
| 8 " (n=6)                                                                                                     | 1.72 ± 0.19              | 0.8694   |
| 2. B-b group                                                                                                  |                          |          |
| 5/6 Nephrectomized rats (+1.35 mg Zn (5.94 mg ZnSO <sub>4</sub> ·7H <sub>2</sub> O)/day/rat supplementation)  |                          |          |
| 0 weeks (n=6)                                                                                                 | 1.53 ± 0.16              |          |
| 2 " (n=6)                                                                                                     | 1.51 ± 0.09              | 0.7316   |
| 4 " (n=6)                                                                                                     | 1.80 ± 0.13              | 0.0147*  |
| 6 " (n=6)                                                                                                     | 1.59 ± 0.12              | 0.3526   |
| 8 " (n=6)                                                                                                     | 1.52 ± 0.11              | 0.9128   |
| 2. B-c group                                                                                                  |                          |          |
| 5/6 Nephrectomized rats (+2.70 mg Zn (11.88 mg ZnSO <sub>4</sub> ·7H <sub>2</sub> O)/day/rat supplementation) |                          |          |
| 0 weeks (n=6)                                                                                                 | 1.47 ± 0.05              |          |
| 2 " (n=6)                                                                                                     | 1.36 ± 0.23              | 0.3879   |
| 4 " (n=6)                                                                                                     | 1.66 ± 0.06              | 0.0132*  |
| 6 " (n=6)                                                                                                     | 1.57 ± 0.09              | 0.1147   |
| 8 " (n=6)                                                                                                     | 1.52 ± 0.11              | 0.5543   |
| 4. B-d group                                                                                                  |                          |          |
| 5/6 Nephrectomized rats (+1.35 mg Zn (15 g oyster)/day/rat supplementation)                                   |                          |          |
| 0 weeks (n=6)                                                                                                 | 1.54 ± 0.07              |          |
| 2 " (n=6)                                                                                                     | 1.62 ± 0.26              | 0.5267   |
| 4 " (n=6)                                                                                                     | 1.71 ± 0.13              | 0.0815   |
| 6 " (n=6)                                                                                                     | 1.72 ± 0.11              | 0.0754   |
| 8 " (n=6)                                                                                                     | 1.63 ± 0.13              | 0.3041   |
| 5. B-e group                                                                                                  |                          |          |
| 5/6 Nephrectomized rats (+2.70 mg Zn (30 g oyster)/day/rat supplementation)                                   |                          |          |
| 0 weeks (n=6)                                                                                                 | 1.53 ± 0.12              |          |
| 2 " (n=6)                                                                                                     | 1.61 ± 0.11              | 0.2353   |
| 4 " (n=6)                                                                                                     | 1.66 ± 0.12              | 0.0565   |
| 6 " (n=6)                                                                                                     | 1.67 ± 0.15              | 0.0360*  |
| 8 " (n=6)                                                                                                     | 1.57 ± 0.26              | 0.7981   |

The data are expressed as the mean±SD (*p*, compared with the 0 week group, \**p*≤0.05)
