# Supplementary material for: Oral Zinc-Rich Oyster Supplementation Corrects Anemia in Rats
Source: MDPI journal article supplement (doi:10.3390/nu15214675), 2023-11-04
Supplement: s1 [file s1]

Table S4. Hematology of the oral ZnSO<sub>4</sub>·7H<sub>2</sub>O, oyster, or hard clam-supplemented 5/6 nephrectomized anemic rats

| Rat group                                                                                                    | RBC<br>(10 <sup>6</sup> /mm <sup>3</sup> ) | HCT<br>(%) | Hb<br>(g/dl) | MCV<br>(μm <sup>3</sup> ) | MCH<br>(pg/cell) | MCHC<br>(g/dl) |
|--------------------------------------------------------------------------------------------------------------|--------------------------------------------|------------|--------------|---------------------------|------------------|----------------|
| 1. d0                                                                                                        |                                            |            |              |                           |                  |                |
| Normal rats (n=6)                                                                                            | 7.91 ± 0.19                                | 48.8 ± 0.4 | 15.9 ± 0.6   | 62 ± 2                    | 20 ± 1           | 33 ± 1         |
| 2. d25                                                                                                       |                                            |            |              |                           |                  |                |
| Normal rats (n=6)                                                                                            | 7.78 ± 0.38                                | 55.1 ± 2.7 | 16.8 ± 0.5   | 71 ± 4                    | 22 ± 1           | 31 ± 2         |
| 5/6 Nephrectomized rats (n=18)                                                                               | 6.27 ± 0.29                                | 42.3 ± 1.8 | 15.8 ± 0.6   | 68 ± 3                    | 25 ± 1           | 37 ± 2         |
| 3. A group                                                                                                   |                                            |            |              |                           |                  |                |
| Normal rats (+0 mg Zn supplementation)                                                                       |                                            |            |              |                           |                  |                |
| 0 weeks (n=6)                                                                                                | 7.78 ± 0.38                                | 55.1 ± 2.7 | 16.8 ± 0.5   | 71 ± 4                    | 22 ± 1           | 31 ± 2         |
| 2 " (n=6)                                                                                                    | 7.65 ± 0.40                                | 48.7 ± 1.7 | 16.5 ± 0.4   | 64 ± 3                    | 22 ± 1           | 34 ± 1         |
| 4 " (n=6)                                                                                                    | 7.79 ± 0.23                                | 47.7 ± 2.6 | 16.7 ± 0.3   | 61 ± 2                    | 21 ± 1           | 35 ± 1         |
| 6 " (n=6)                                                                                                    | 7.95 ± 0.32                                | 51.4 ± 1.3 | 16.6 ± 0.5   | 65 ± 3                    | 21 ± 1           | 32 ± 1         |
| 8 " (n=6)                                                                                                    | 7.69 ± 0.30                                | 49.1 ± 1.0 | 16.5 ± 0.5   | 64 ± 2                    | 21 ± 1           | 34 ± 1         |
| 4. B-a group                                                                                                 |                                            |            |              |                           |                  |                |
| 5/6 Nephrectomized rats (+2.70 mg Zn (5,94 mg ZnSO <sub>4</sub> ·7H <sub>2</sub> O)/day/rat supplementation) |                                            |            |              |                           |                  |                |
| 0 weeks (n=6)                                                                                                | 6.26 ± 0.34                                | 42.9 ± 1.1 | 15.6 ± 0.5   | 69 ± 3                    | 25 ± 1           | 36 ± 1         |
| 2 " (n=6)                                                                                                    | 6.17 ± 0.15                                | 41.2 ± 1.5 | 15.1 ± 0.9   | 67 ± 2                    | 24 ± 1           | 37 ± 2         |
| 4 " (n=6)                                                                                                    | 6.15 ± 0.25                                | 42.0 ± 1.6 | 15.8 ± 0.7   | 68 ± 2                    | 26 ± 1           | 38 ± 1         |
| 6 " (n=6)                                                                                                    | 6.43 ± 0.34                                | 43.4 ± 1.9 | 15.9 ± 0.5   | 68 ± 2                    | 25 ± 1           | 37 ± 2         |
| 8 " (n=6)                                                                                                    | 5.81 ± 0.28                                | 39.5 ± 1.6 | 14.1 ± 0.8   | 68 ± 3                    | 24 ± 1           | 36 ± 1         |
| 5. B-b group                                                                                                 |                                            |            |              |                           |                  |                |
| 5/6 Nephrectomized rats (+2.70 mg Zn (30 g oyster)/day/rat supplementation)                                  |                                            |            |              |                           |                  |                |
| 0 weeks (n=6)                                                                                                | 6.22 ± 0.24                                | 41.6 ± 1.1 | 15.9 ± 0.7   | 67 ± 2                    | 26 ± 1           | 38 ± 2         |
| 2 " (n=6)                                                                                                    | 6.76 ± 0.24**                              | 41.4 ± 1.2 | 15.2 ± 0.7   | 61 ± 3                    | 22 ± 1           | 37 ± 2         |
| 4 " (n=6)                                                                                                    | 6.87 ± 0.17**                              | 42.2 ± 2.6 | 15.7 ± 0.7   | 61 ± 3                    | 23 ± 1           | 37 ± 1         |
| 6 " (n=6)                                                                                                    | 6.92 ± 0.38**                              | 42.5 ± 2.0 | 15.9 ± 1.0   | 61 ± 3                    | 23 ± 1           | 37 ± 1         |
| 8 " (n=6)                                                                                                    | 6.85 ± 1.12**                              | 41.3 ± 1.7 | 15.4 ± 0.9   | 60 ± 3                    | 23 ± 1           | 37 ± 1         |
| 6. B-c group                                                                                                 |                                            |            |              |                           |                  |                |
| 5/6 Nephrectomized rats (+0.42 mg Zn (30 g hard clam)/day/rat supplementation)                               |                                            |            |              |                           |                  |                |
| 0 weeks (n=6)                                                                                                | 6.32 ± 0.25                                | 42.4 ± 2.5 | 15.9 ± 0.2   | 67 ± 4                    | 25 ± 1           | 38 ± 2         |
| 2 " (n=6)                                                                                                    | 5.98 ± 0.49                                | 39.7 ± 0.9 | 15.3 ± 0.7   | 66 ± 3                    | 26 ± 1           | 38 ± 1         |
| 4 " (n=6)                                                                                                    | 6.08 ± 0.32                                | 40.2 ± 1.1 | 15.5 ± 0.8   | 66 ± 2                    | 25 ± 2           | 38 ± 1         |
| 6 " (n=6)                                                                                                    | 6.12 ± 0.27                                | 41.4 ± 2.6 | 15.5 ± 1.1   | 68 ± 2                    | 25 ± 1           | 37 ± 2         |
| 8 " (n=6)                                                                                                    | 5.72 ± 0.54                                | 38.8 ± 2.4 | 14.2 ± 1.4   | 68 ± 3                    | 25 ± 1           | 37 ± 2         |

RBC total red blood cell count, HCT hematocrit, Hb hemoglobin, MCV mean corpuscular volume (HCT/RBC

$\times 10$ ), MCH mean corpuscular hemoglobin ( $\text{Hb}/\text{RBC} \times 100$ ), MCHC mean corpuscular hemoglobin concentration ( $\text{Hb}/\text{HCT} \times 100$ )

The data are expressed as the mean  $\pm$  SD

(\*  $p < 0.05$ , \*\*  $p < 0.01$ , \*\*\*  $p < 0.001$  Compared with the 0-week group)
