# Supplementary material for: Oral Zinc-Rich Oyster Supplementation Corrects Anemia in Rats
Source: MDPI journal article supplement (doi:10.3390/nu15214675), 2023-11-04
Supplement: s1 [file s1]

Table S2. Hematology of the oral ZnSO<sub>4</sub>·7H<sub>2</sub>O and oyster-supplemented 5/6 nephrectomized anemic rats

| Rat group                                                                                                     | RBC<br>(10 <sup>6</sup> /mm <sup>3</sup> ) | HCT<br>(%)  | Hb<br>(g/dl) | MCV<br>(μm <sup>3</sup> ) | MCH<br>(pg/cell) | MCHC<br>(g/dl) |
|---------------------------------------------------------------------------------------------------------------|--------------------------------------------|-------------|--------------|---------------------------|------------------|----------------|
| 1. d0                                                                                                         |                                            |             |              |                           |                  |                |
| Normal rats (n=6)                                                                                             | 7.13 ± 0.31                                | 40.9 ± 2.4  | 14.8 ± 0.8   | 57 ± 3                    | 21 ± 1           | 26 ± 1         |
| 2. d25                                                                                                        |                                            |             |              |                           |                  |                |
| Normal rats (n=6)                                                                                             | 6.81 ± 0.56                                | 45.8 ± 1.3  | 17.7 ± 0.4   | 68 ± 4                    | 26 ± 2           | 39 ± 1         |
| 5/6 Nephrectomized rats (n=30)                                                                                | 5.75 ± 0.40                                | 37.8 ± 3.2  | 16.6 ± 1.1   | 67 ± 6                    | 29 ± 4           | 44 ± 4         |
| 3. A group                                                                                                    |                                            |             |              |                           |                  |                |
| Normal rats (+0 mg Zn supplementation)                                                                        |                                            |             |              |                           |                  |                |
| 0 weeks (n=6)                                                                                                 | 6.81 ± 0.56                                | 45.8 ± 1.3  | 17.7 ± 0.4   | 68 ± 4                    | 26 ± 2           | 39 ± 1         |
| 2 " (n=6)                                                                                                     | 7.28 ± 0.47                                | 46.8 ± 1.8  | 17.6 ± 0.6   | 64 ± 3                    | 24 ± 1           | 38 ± 2         |
| 4 " (n=6)                                                                                                     | 7.38 ± 0.55                                | 46.8 ± 2.2  | 17.3 ± 0.3   | 64 ± 3                    | 24 ± 1           | 37 ± 1         |
| 6 " (n=6)                                                                                                     | 7.26 ± 0.61                                | 45.9 ± 3.1  | 17.4 ± 0.8   | 63 ± 3                    | 24 ± 2           | 38 ± 2         |
| 8 " (n=6)                                                                                                     | 7.41 ± 0.74                                | 45.8 ± 3.0  | 18.2 ± 0.8   | 62 ± 4                    | 25 ± 2           | 40 ± 2         |
| 4. B-a group                                                                                                  |                                            |             |              |                           |                  |                |
| 5/6 Nephrectomized rats (+0 mg Zn supplementation)                                                            |                                            |             |              |                           |                  |                |
| 0 weeks (n=6)                                                                                                 | 5.75 ± 0.38                                | 38.0 ± 3.7  | 13.6 ± 1.2   | 66 ± 2                    | 24 ± 1           | 36 ± 1         |
| 2 " (n=6)                                                                                                     | 5.87 ± 0.45                                | 37.4 ± 2.4  | 13.7 ± 0.8   | 64 ± 2                    | 23 ± 1           | 37 ± 1         |
| 4 " (n=6)                                                                                                     | 5.99 ± 0.26                                | 37.6 ± 0.8  | 13.7 ± 0.4   | 63 ± 2                    | 23 ± 1           | 36 ± 0         |
| 6 " (n=6)                                                                                                     | 5.67 ± 0.49                                | 36.0 ± 2.3  | 13.2 ± 0.8   | 63 ± 2                    | 23 ± 1           | 37 ± 1         |
| 8 " (n=6)                                                                                                     | 5.00 ± 0.77                                | 31.9 ± 4.1  | 11.5 ± 1.4   | 64 ± 3                    | 23 ± 1           | 36 ± 1         |
| 5. B-b group                                                                                                  |                                            |             |              |                           |                  |                |
| 5/6 Nephrectomized rats (+1.35 mg Zn (5.94 mg ZnSO <sub>4</sub> ·7H <sub>2</sub> O)/day/rat supplementation)  |                                            |             |              |                           |                  |                |
| 0 weeks (n=6)                                                                                                 | 5.93 ± 0.66                                | 37.9 ± 1.5  | 16.5 ± 0.8   | 65 ± 7                    | 28 ± 2           | 43 ± 2         |
| 2 " (n=6)                                                                                                     | 5.86 ± 0.22                                | 38.9 ± 1.0  | 16.0 ± 0.2   | 66 ± 2                    | 27 ± 1           | 41 ± 2         |
| 4 " (n=6)                                                                                                     | 5.80 ± 0.52                                | 38.0 ± 1.8  | 15.3 ± 0.7   | 66 ± 4                    | 27 ± 2           | 40 ± 1         |
| 6 " (n=6)                                                                                                     | 5.60 ± 0.59                                | 37.9 ± 3.1  | 15.7 ± 0.6   | 68 ± 2                    | 28 ± 2           | 42 ± 3         |
| 8 " (n=6)                                                                                                     | 5.70 ± 1.12                                | 37.4 ± 6.0  | 16.2 ± 1.5   | 66 ± 3                    | 29 ± 3           | 44 ± 3         |
| 6. B-c group                                                                                                  |                                            |             |              |                           |                  |                |
| 5/6 Nephrectomized rats (+2.70 mg Zn (11.88 mg ZnSO <sub>4</sub> ·7H <sub>2</sub> O)/day/rat supplementation) |                                            |             |              |                           |                  |                |
| 0 weeks (n=6)                                                                                                 | 5.85 ± 0.29                                | 38.5 ± 4.3  | 16.7 ± 0.8   | 66 ± 5                    | 29 ± 2           | 44 ± 4         |
| 2 " (n=6)                                                                                                     | 6.36 ± 0.55*                               | 41.6 ± 3.4* | 16.4 ± 1.0   | 66 ± 2                    | 26 ± 1           | 40 ± 2         |
| 4 " (n=6)                                                                                                     | 6.05 ± 0.78                                | 40.0 ± 5.1  | 15.7 ± 0.7   | 66 ± 2                    | 26 ± 3           | 40 ± 5         |
| 6 " (n=6)                                                                                                     | 5.98 ± 0.78                                | 39.7 ± 4.5  | 16.6 ± 1.0   | 67 ± 2                    | 28 ± 2           | 42 ± 2         |
| 8 " (n=6)                                                                                                     | 6.18 ± 0.76                                | 40.1 ± 3.9  | 16.3 ± 1.2   | 65 ± 2                    | 27 ± 2           | 41 ± 2         |

## 7. B-d group

5/6 Nephrectomized rats (+1.35 mg Zn (15 g oyster)/day/rat supplementation)

|               |              |            |            |        |        |        |
|---------------|--------------|------------|------------|--------|--------|--------|
| 0 weeks (n=6) | 5.52 ± 0.48  | 37.3 ± 0.9 | 16.3 ± 0.7 | 67 ± 2 | 30 ± 1 | 44 ± 2 |
| 2 " (n=6)     | 5.77 ± 0.69  | 39.2 ± 3.0 | 15.7 ± 0.4 | 68 ± 1 | 27 ± 2 | 40 ± 2 |
| 4 " (n=6)     | 6.27 ± 0.79* | 41.6 ± 3.6 | 16.2 ± 0.9 | 67 ± 2 | 26 ± 2 | 39 ± 1 |
| 6 " (n=6)     | 6.09 ± 0.41* | 40.5 ± 2.3 | 16.9 ± 0.5 | 67 ± 1 | 28 ± 2 | 42 ± 2 |
| 8 " (n=6)     | 5.91 ± 0.96  | 38.9 ± 3.8 | 15.8 ± 1.3 | 66 ± 3 | 27 ± 2 | 41 ± 1 |

## 8. B-e group

5/6 Nephrectomized rats (+2.70 mg Zn (30 g oyster)/day/rat supplementation)

|               |               |               |            |        |        |        |
|---------------|---------------|---------------|------------|--------|--------|--------|
| 0 weeks (n=6) | 5.69 ± 0.32   | 37.3 ± 1.1    | 16.8 ± 0.9 | 66 ± 2 | 30 ± 2 | 45 ± 3 |
| 2 " (n=6)     | 6.21 ± 0.31** | 41.8 ± 1.9*** | 16.5 ± 0.6 | 68 ± 1 | 27 ± 1 | 40 ± 2 |
| 4 " (n=6)     | 6.16 ± 0.40*  | 41.2 ± 2.9*   | 16.4 ± 0.7 | 67 ± 2 | 27 ± 1 | 40 ± 2 |
| 6 " (n=6)     | 6.18 ± 0.51*  | 40.6 ± 1.8**  | 17.0 ± 0.7 | 66 ± 3 | 28 ± 1 | 42 ± 1 |
| 8 " (n=6)     | 6.63 ± 0.49** | 42.0 ± 2.7**  | 16.7 ± 0.6 | 64 ± 4 | 25 ± 1 | 40 ± 2 |

RBC total red blood cell count, HCT hematocrit, Hb hemoglobin, MCV mean corpuscular volume (HCT/RBC × 10), MCH mean corpuscular hemoglobin (Hb/RBC × 100), MCHC mean corpuscular hemoglobin concentration (Hb/HCT×100)

The data are expressed as the mean ± SD

(\*  $p < 0.05$ , \*\*  $p < 0.01$ , \*\*\*  $p < 0.001$  Compared with the 0-week group).

This table represents two independent experiments.
